# Supplementary material for: Real-World Electronic Medical Records Data Identify Risk Factors for Myelofibrosis and Can Be Used to Validate Established Prognostic Scores
Source: MDPI journal article supplement (doi:10.3390/cancers16071416), 2024-04-05
Supplement: s1 [file s1]

Supplementary Table S1: Patient characteristics

A) Age

| Cohort 1 (Age > 65 years, N = 10,975) and cohort 2 (Age ≤ 65 years, N = 10,975) characteristics after propensity score matching. Cohort sizes may differ from the numbers indicated in Figure 1 due to the exclusion of patients with outcome prior to the index event. |                                                |                 |          |             |
|-------------------------------------------------------------------------------------------------------------------------------------------------------------------------------------------------------------------------------------------------------------------------|------------------------------------------------|-----------------|----------|-------------|
| Cohort                                                                                                                                                                                                                                                                  | Parameter                                      | Mean ± SD       | Patients | % of Cohort |
| 1                                                                                                                                                                                                                                                                       | Age at Diagnosis                               | 71.9 +/- 4.5    |          |             |
| 2                                                                                                                                                                                                                                                                       |                                                | 49.3 +/- 13.3   |          |             |
| 1                                                                                                                                                                                                                                                                       | Female                                         |                 | 5149     | 46.9%       |
| 2                                                                                                                                                                                                                                                                       |                                                |                 | 5137     | 46.8%       |
| 1                                                                                                                                                                                                                                                                       | Male                                           |                 | 4967     | 45.3%       |
| 2                                                                                                                                                                                                                                                                       |                                                |                 | 4979     | 45.4%       |
| 1                                                                                                                                                                                                                                                                       | Black or African American                      |                 | 574      | 5.2%        |
| 2                                                                                                                                                                                                                                                                       |                                                |                 | 577      | 5.3%        |
| 1                                                                                                                                                                                                                                                                       | White                                          |                 | 7934     | 72.3%       |
| 2                                                                                                                                                                                                                                                                       |                                                |                 | 7935     | 72.3%       |
| 1                                                                                                                                                                                                                                                                       | Asian                                          |                 | 215      | 2.0%        |
| 2                                                                                                                                                                                                                                                                       |                                                |                 | 210      | 1.9%        |
| 1                                                                                                                                                                                                                                                                       | Other Race                                     |                 | 209      | 1.9%        |
| 2                                                                                                                                                                                                                                                                       |                                                |                 | 206      | 1.9%        |
| 1                                                                                                                                                                                                                                                                       | Hemoglobin (in g/dl) in Blood                  | 12.7 +/- 2.3    |          |             |
| 2                                                                                                                                                                                                                                                                       |                                                | 13.0 +/- 2.4    |          |             |
| 1                                                                                                                                                                                                                                                                       | Platelets (in ×10 <sup>3</sup> /μl) in Blood   | 216.8 +/- 110.2 |          |             |
| 2                                                                                                                                                                                                                                                                       |                                                | 228.0 +/- 123.5 |          |             |
| 1                                                                                                                                                                                                                                                                       | Monocytes (in ×10 <sup>3</sup> /μl) in Blood   | 2.5 +/- 29.3    |          |             |
| 2                                                                                                                                                                                                                                                                       |                                                | 4.2 +/- 46.6    |          |             |
| 1                                                                                                                                                                                                                                                                       | Basophils (in ×10 <sup>3</sup> /μl) in Blood   | 0.2 +/- 2.5     |          |             |
| 2                                                                                                                                                                                                                                                                       |                                                | 0.2 +/- 2.7     |          |             |
| 1                                                                                                                                                                                                                                                                       | Eosinophils (in ×10 <sup>3</sup> /μl) in Blood | 0.3 +/- 3.4     |          |             |
| 2                                                                                                                                                                                                                                                                       |                                                | 0.3 +/- 3.7     |          |             |
| 1                                                                                                                                                                                                                                                                       | Leukocytes (in ×10 <sup>3</sup> /μl) in Blood  | 7.6 +/- 9.2     |          |             |
| 2                                                                                                                                                                                                                                                                       |                                                | 14.2 +/- 170.1  |          |             |

Supplementary Table S1: Patient characteristics

B) Anemia

| Cohort 1 (Hb < 10mg/dl, N = 3021) and cohort 2 (Hb ≥ 10mg/dl, N = 3021) characteristics after propensity score matching. Cohort sizes may differ from the numbers indicated in Figure 1 due to the exclusion of patients with outcome prior to the index event. |                                                |                 |          |             |
|-----------------------------------------------------------------------------------------------------------------------------------------------------------------------------------------------------------------------------------------------------------------|------------------------------------------------|-----------------|----------|-------------|
| Cohort                                                                                                                                                                                                                                                          | Parameter                                      | Mean ± SD       | Patients | % of Cohort |
| 1                                                                                                                                                                                                                                                               | Age at Diagnosis                               | 61.5 +/- 18.8   |          |             |
| 2                                                                                                                                                                                                                                                               |                                                | 62.2 +/- 17.7   |          |             |
| 1                                                                                                                                                                                                                                                               | Female                                         |                 | 1560     | 51.6%       |
| 2                                                                                                                                                                                                                                                               |                                                |                 | 1596     | 52.8%       |
| 1                                                                                                                                                                                                                                                               | Male                                           |                 | 1386     | 45.9%       |
| 2                                                                                                                                                                                                                                                               |                                                |                 | 1361     | 45.1%       |
| 1                                                                                                                                                                                                                                                               | Black or African American                      |                 | 394      | 13.0%       |
| 2                                                                                                                                                                                                                                                               |                                                |                 | 399      | 13.2%       |
| 1                                                                                                                                                                                                                                                               | White                                          |                 | 1735     | 57.4%       |
| 2                                                                                                                                                                                                                                                               |                                                |                 | 1719     | 56.9%       |
| 1                                                                                                                                                                                                                                                               | Asian                                          |                 | 67       | 2.2%        |
| 2                                                                                                                                                                                                                                                               |                                                |                 | 79       | 2.6%        |
| 1                                                                                                                                                                                                                                                               | Other Race                                     |                 | 84       | 2.8%        |
| 2                                                                                                                                                                                                                                                               |                                                |                 | 77       | 2.5%        |
| 1                                                                                                                                                                                                                                                               | Hemoglobin (in g/dl) in Blood                  | 8.7 +/- 1.3     |          |             |
| 2                                                                                                                                                                                                                                                               |                                                | 13.3 +/- 1.6    |          |             |
| 1                                                                                                                                                                                                                                                               | Platelets (in ×10 <sup>3</sup> /μl) in Blood   | 196.7 +/- 160.7 |          |             |
| 2                                                                                                                                                                                                                                                               |                                                | 216.8 +/- 107.7 |          |             |
| 1                                                                                                                                                                                                                                                               | Monocytes (in ×10 <sup>3</sup> /μl) in Blood   | 3.2 +/- 40.0    |          |             |
| 2                                                                                                                                                                                                                                                               |                                                | 12.6 +/- 79.6   |          |             |
| 1                                                                                                                                                                                                                                                               | Basophils (in ×10 <sup>3</sup> /μl) in Blood   | 0.1 +/- 1.3     |          |             |
| 2                                                                                                                                                                                                                                                               |                                                | 0.8 +/- 5.2     |          |             |
| 1                                                                                                                                                                                                                                                               | Eosinophils (in ×10 <sup>3</sup> /μl) in Blood | 0.3 +/- 3.4     |          |             |
| 2                                                                                                                                                                                                                                                               |                                                | 0.8 +/- 6.5     |          |             |
| 1                                                                                                                                                                                                                                                               | Leukocytes (in ×10 <sup>3</sup> /μl) in Blood  | 9.8 +/- 60.9    |          |             |
| 2                                                                                                                                                                                                                                                               |                                                | 16.7 +/- 195.5  |          |             |

Supplementary Table S1: Patient characteristics

C) Leukocytosis

| Cohort 1 (Leukocytes > 25×10 <sup>3</sup> /μl, N = 233) and cohort 2 (Leukocytes ≤ 25×10 <sup>3</sup> /μl, N = 233) characteristics after propensity score matching. Cohort sizes may differ from the numbers indicated in Figure 1 due to the exclusion of patients with outcome prior to the index event. |                                                |                 |          |             |
|-------------------------------------------------------------------------------------------------------------------------------------------------------------------------------------------------------------------------------------------------------------------------------------------------------------|------------------------------------------------|-----------------|----------|-------------|
| Cohort                                                                                                                                                                                                                                                                                                      | Parameter                                      | Mean ± SD       | Patients | % of Cohort |
| 1                                                                                                                                                                                                                                                                                                           | Age at Diagnosis                               | 65.2 +/- 15.8   |          |             |
| 2                                                                                                                                                                                                                                                                                                           |                                                | 65.7 +/- 14.2   |          |             |
| 1                                                                                                                                                                                                                                                                                                           | Female                                         |                 | 95       | 40.8%       |
| 2                                                                                                                                                                                                                                                                                                           |                                                |                 | 97       | 41.6%       |
| 1                                                                                                                                                                                                                                                                                                           | Male                                           |                 | 131      | 56.2%       |
| 2                                                                                                                                                                                                                                                                                                           |                                                |                 | 126      | 54.1%       |
| 1                                                                                                                                                                                                                                                                                                           | Black or African American                      |                 | 12       | 5.2%        |
| 2                                                                                                                                                                                                                                                                                                           |                                                |                 | 10       | 4.3%        |
| 1                                                                                                                                                                                                                                                                                                           | White                                          |                 | 162      | 69.5%       |
| 2                                                                                                                                                                                                                                                                                                           |                                                |                 | 137      | 58.8%       |
| 1                                                                                                                                                                                                                                                                                                           | Asian                                          |                 | 10       | 4.3%        |
| 2                                                                                                                                                                                                                                                                                                           |                                                |                 | 10       | 4.3%        |
| 1                                                                                                                                                                                                                                                                                                           | Other Race                                     |                 | 10       | 4.3%        |
| 2                                                                                                                                                                                                                                                                                                           |                                                |                 | 10       | 4.3%        |
| 1                                                                                                                                                                                                                                                                                                           | Hemoglobin (in g/dl) in Blood                  | 11.5 +/- 2.7    |          |             |
| 2                                                                                                                                                                                                                                                                                                           |                                                | 12.8 +/- 2.7    |          |             |
| 1                                                                                                                                                                                                                                                                                                           | Platelets (in ×10 <sup>3</sup> /μl) in Blood   | 231.5 +/- 181.6 |          |             |
| 2                                                                                                                                                                                                                                                                                                           |                                                | 217.4 +/- 116.3 |          |             |
| 1                                                                                                                                                                                                                                                                                                           | Monocytes (in ×10 <sup>3</sup> /μl) in Blood   | 98.2 +/- 328.3  |          |             |
| 2                                                                                                                                                                                                                                                                                                           |                                                | 127.9 +/- 240.0 |          |             |
| 1                                                                                                                                                                                                                                                                                                           | Basophils (in ×10 <sup>3</sup> /μl) in Blood   | 8.3 +/- 15.6    |          |             |
| 2                                                                                                                                                                                                                                                                                                           |                                                | 7.5 +/- 15.4    |          |             |
| 1                                                                                                                                                                                                                                                                                                           | Eosinophils (in ×10 <sup>3</sup> /μl) in Blood | 6.3 +/- 20.0    |          |             |
| 2                                                                                                                                                                                                                                                                                                           |                                                | 6.5 +/- 20.1    |          |             |
| 1                                                                                                                                                                                                                                                                                                           | Leukocytes (in ×10 <sup>3</sup> /μl) in Blood  | 360 +/- 1,061   |          |             |
| 2                                                                                                                                                                                                                                                                                                           |                                                | 7.02 +/- 3.19   |          |             |

Supplementary Table S1: Patient characteristics

D) Thrombocytopenia

| Cohort 1 (Thrombocytes < 150×10 <sup>3</sup> /μl, N = 5006) and cohort 2 (Thrombocytes ≥ 150×10 <sup>3</sup> /μl, N = 5006) characteristics after propensity score matching. Cohort sizes may differ from the numbers indicated in Figure 1 due to the exclusion of patients with outcome prior to the index event. |                                                |                 |          |             |
|---------------------------------------------------------------------------------------------------------------------------------------------------------------------------------------------------------------------------------------------------------------------------------------------------------------------|------------------------------------------------|-----------------|----------|-------------|
| Cohort                                                                                                                                                                                                                                                                                                              | Parameter                                      | Mean ± SD       | Patients | % of Cohort |
| 1                                                                                                                                                                                                                                                                                                                   | Age at Diagnosis                               | 62.5 +/- 17.0   |          |             |
| 2                                                                                                                                                                                                                                                                                                                   |                                                | 62.9 +/- 16.8   |          |             |
| 1                                                                                                                                                                                                                                                                                                                   | Female                                         |                 | 1994     | 39.8%       |
| 2                                                                                                                                                                                                                                                                                                                   |                                                |                 | 1971     | 39.4%       |
| 1                                                                                                                                                                                                                                                                                                                   | Male                                           |                 | 2845     | 56.8%       |
| 2                                                                                                                                                                                                                                                                                                                   |                                                |                 | 2872     | 57.4%       |
| 1                                                                                                                                                                                                                                                                                                                   | Black or African American                      |                 | 369      | 7.4%        |
| 2                                                                                                                                                                                                                                                                                                                   |                                                |                 | 368      | 7.4%        |
| 1                                                                                                                                                                                                                                                                                                                   | White                                          |                 | 111      | 2.2%        |
| 2                                                                                                                                                                                                                                                                                                                   |                                                |                 | 102      | 2.0%        |
| 1                                                                                                                                                                                                                                                                                                                   | Asian                                          |                 | 111      | 2.2%        |
| 2                                                                                                                                                                                                                                                                                                                   |                                                |                 | 102      | 2.0%        |
| 1                                                                                                                                                                                                                                                                                                                   | Other Race                                     |                 | 148      | 3.0%        |
| 2                                                                                                                                                                                                                                                                                                                   |                                                |                 | 153      | 3.1%        |
| 1                                                                                                                                                                                                                                                                                                                   | Hemoglobin (in g/dl) in Blood                  | 11.7 +/- 2.7    |          |             |
| 2                                                                                                                                                                                                                                                                                                                   |                                                | 13.1 +/- 2.3    |          |             |
| 1                                                                                                                                                                                                                                                                                                                   | Platelets (in ×10 <sup>3</sup> /μl) in Blood   | 107.8 +/- 44.0  |          |             |
| 2                                                                                                                                                                                                                                                                                                                   |                                                | 258.8 +/- 107.6 |          |             |
| 1                                                                                                                                                                                                                                                                                                                   | Monocytes (in ×10 <sup>3</sup> /μl) in Blood   | 5.2 +/- 49.4    |          |             |
| 2                                                                                                                                                                                                                                                                                                                   |                                                | 8.0 +/- 67.2    |          |             |
| 1                                                                                                                                                                                                                                                                                                                   | Basophils (in ×10 <sup>3</sup> /μl) in Blood   | 0.3 +/- 2.7     |          |             |
| 2                                                                                                                                                                                                                                                                                                                   |                                                | 0.5 +/- 3.8     |          |             |
| 1                                                                                                                                                                                                                                                                                                                   | Eosinophils (in ×10 <sup>3</sup> /μl) in Blood | 0.3 +/- 3.3     |          |             |
| 2                                                                                                                                                                                                                                                                                                                   |                                                | 0.6 +/- 5.9     |          |             |
| 1                                                                                                                                                                                                                                                                                                                   | Leukocytes (in ×10 <sup>3</sup> /μl) in Blood  | 12.3 +/- 144.7  |          |             |
| 2                                                                                                                                                                                                                                                                                                                   |                                                | 13.4 +/- 152.5  |          |             |

Supplementary Table S1: Patient characteristics

E) Monocytosis

| Cohort 1 (Monocytes > 0.8×10 <sup>3</sup> /μl, N = 1838) and cohort 2 (Monocytes ≤ 0.8×10 <sup>3</sup> /μl, N = 1838) characteristics after propensity score matching. Cohort sizes may differ from the numbers indicated in Figure 1 due to the exclusion of patients with outcome prior to the index event |                                                |                 |          |             |
|--------------------------------------------------------------------------------------------------------------------------------------------------------------------------------------------------------------------------------------------------------------------------------------------------------------|------------------------------------------------|-----------------|----------|-------------|
| Cohort                                                                                                                                                                                                                                                                                                       | Parameter                                      | Mean ± SD       | Patients | % of Cohort |
| 1                                                                                                                                                                                                                                                                                                            | Age at Diagnosis                               | 62.8 +/- 17.9   |          |             |
| 2                                                                                                                                                                                                                                                                                                            |                                                | 64.5 +/- 16.7   |          |             |
| 1                                                                                                                                                                                                                                                                                                            | Female                                         |                 | 761      | 41.4%       |
| 2                                                                                                                                                                                                                                                                                                            |                                                |                 | 741      | 40.3%       |
| 1                                                                                                                                                                                                                                                                                                            | Male                                           |                 | 924      | 50.3%       |
| 2                                                                                                                                                                                                                                                                                                            |                                                |                 | 941      | 51.2%       |
| 1                                                                                                                                                                                                                                                                                                            | Black or African American                      |                 | 102      | 5.5%        |
| 2                                                                                                                                                                                                                                                                                                            |                                                |                 | 87       | 4.7%        |
| 1                                                                                                                                                                                                                                                                                                            | White                                          |                 | 1248     | 67.9%       |
| 2                                                                                                                                                                                                                                                                                                            |                                                |                 | 1308     | 71.2%       |
| 1                                                                                                                                                                                                                                                                                                            | Asian                                          |                 | 34       | 1.8%        |
| 2                                                                                                                                                                                                                                                                                                            |                                                |                 | 32       | 1.7%        |
| 1                                                                                                                                                                                                                                                                                                            | Other Race                                     |                 | 47       | 2.6%        |
| 2                                                                                                                                                                                                                                                                                                            |                                                |                 | 37       | 2.0%        |
| 1                                                                                                                                                                                                                                                                                                            | Hemoglobin (in g/dl) in Blood                  | 12.8 +/- 2.3    |          |             |
| 2                                                                                                                                                                                                                                                                                                            |                                                | 12.9 +/- 2.3    |          |             |
| 1                                                                                                                                                                                                                                                                                                            | Platelets (in ×10 <sup>3</sup> /μl) in Blood   | 252.8 +/- 137.8 |          |             |
| 2                                                                                                                                                                                                                                                                                                            |                                                | 223.1 +/- 117.3 |          |             |
| 1                                                                                                                                                                                                                                                                                                            | Monocytes (in ×10 <sup>3</sup> /μl) in Blood   | 18.1 +/- 98.5   |          |             |
| 2                                                                                                                                                                                                                                                                                                            |                                                | 0.5 +/- 0.2     |          |             |
| 1                                                                                                                                                                                                                                                                                                            | Basophils (in ×10 <sup>3</sup> /μl) in Blood   | 0.7 +/- 4.3     |          |             |
| 2                                                                                                                                                                                                                                                                                                            |                                                | 0.1 +/- 0.2     |          |             |
| 1                                                                                                                                                                                                                                                                                                            | Eosinophils (in ×10 <sup>3</sup> /μl) in Blood | 1.2 +/- 8.2     |          |             |
| 2                                                                                                                                                                                                                                                                                                            |                                                | 0.2 +/- 0.3     |          |             |
| 1                                                                                                                                                                                                                                                                                                            | Leukocytes (in ×10 <sup>3</sup> /μl) in Blood  | 20.7 +/- 219.0  |          |             |
| 2                                                                                                                                                                                                                                                                                                            |                                                | 7.3 +/- 6.9     |          |             |

Supplementary Table S1: Patient characteristics

F) Basophilia

| Cohort 1 (Monocytes > 0.8×10 <sup>3</sup> /μl, N = 513) and cohort 2 (Monocytes ≤ 0.8×10 <sup>3</sup> /μl, N = 513) characteristics after propensity score matching. Cohort sizes may differ from the numbers indicated in Figure 1 due to the exclusion of patients with outcome prior to the index event |                                                |                 |          |             |
|------------------------------------------------------------------------------------------------------------------------------------------------------------------------------------------------------------------------------------------------------------------------------------------------------------|------------------------------------------------|-----------------|----------|-------------|
| Cohort                                                                                                                                                                                                                                                                                                     | Parameter                                      | Mean ± SD       | Patients | % of Cohort |
| 1                                                                                                                                                                                                                                                                                                          | Age at Diagnosis                               | 60.0 +/- 17.3   |          |             |
| 2                                                                                                                                                                                                                                                                                                          |                                                | 61.1 +/- 18.0   |          |             |
| 1                                                                                                                                                                                                                                                                                                          | Female                                         |                 | 258      | 50.3%       |
| 2                                                                                                                                                                                                                                                                                                          |                                                |                 | 242      | 47.2%       |
| 1                                                                                                                                                                                                                                                                                                          | Male                                           |                 | 223      | 43.5%       |
| 2                                                                                                                                                                                                                                                                                                          |                                                |                 | 225      | 43.9%       |
| 1                                                                                                                                                                                                                                                                                                          | Black or African American                      |                 | 36       | 7.0%        |
| 2                                                                                                                                                                                                                                                                                                          |                                                |                 | 30       | 5.8%        |
| 1                                                                                                                                                                                                                                                                                                          | White                                          |                 | 301      | 58.7%       |
| 2                                                                                                                                                                                                                                                                                                          |                                                |                 | 293      | 57.1%       |
| 1                                                                                                                                                                                                                                                                                                          | Asian                                          |                 | 18       | 3.5%        |
| 2                                                                                                                                                                                                                                                                                                          |                                                |                 | 14       | 2.7%        |
| 1                                                                                                                                                                                                                                                                                                          | Other Race                                     |                 | 10       | 1.9%        |
| 2                                                                                                                                                                                                                                                                                                          |                                                |                 | 10       | 1.9%        |
| 1                                                                                                                                                                                                                                                                                                          | Hemoglobin (in g/dl) in Blood                  | 12.7 +/- 2.4    |          |             |
| 2                                                                                                                                                                                                                                                                                                          |                                                | 11.6 +/- 2.9    |          |             |
| 1                                                                                                                                                                                                                                                                                                          | Platelets (in ×10 <sup>3</sup> /μl) in Blood   | 251.4 +/- 167.2 |          |             |
| 2                                                                                                                                                                                                                                                                                                          |                                                | 216.3 +/- 141.2 |          |             |
| 1                                                                                                                                                                                                                                                                                                          | Monocytes (in ×10 <sup>3</sup> /μl) in Blood   | 227.4 +/- 282.7 |          |             |
| 2                                                                                                                                                                                                                                                                                                          |                                                | 16.6 +/- 110.9  |          |             |
| 1                                                                                                                                                                                                                                                                                                          | Basophils (in ×10 <sup>3</sup> /μl) in Blood   | 11.3 +/- 16.2   |          |             |
| 2                                                                                                                                                                                                                                                                                                          |                                                | 0.0 +/- 0.1     |          |             |
| 1                                                                                                                                                                                                                                                                                                          | Eosinophils (in ×10 <sup>3</sup> /μl) in Blood | 14.1 +/- 27.8   |          |             |
| 2                                                                                                                                                                                                                                                                                                          |                                                | 0.9 +/- 4.9     |          |             |
| 1                                                                                                                                                                                                                                                                                                          | Leukocytes (in ×10 <sup>3</sup> /μl) in Blood  | 25.9 +/- 259.6  |          |             |
| 2                                                                                                                                                                                                                                                                                                          |                                                | 12.2 +/- 23.2   |          |             |

Supplementary Table S1: Patient characteristics

G) Eosinophilia

| Cohort 1 (Eosinophils > 0.5×10 <sup>3</sup> /μl, N = 632) and cohort 2 (Eosinophils ≤ 0.5×10 <sup>3</sup> /μl, N = 632) characteristics after propensity score matching. Cohort sizes may differ from the numbers indicated in Figure 1 due to the exclusion of patients with outcome prior to the index event. |                                                |                                    |            |                |
|-----------------------------------------------------------------------------------------------------------------------------------------------------------------------------------------------------------------------------------------------------------------------------------------------------------------|------------------------------------------------|------------------------------------|------------|----------------|
| Cohort                                                                                                                                                                                                                                                                                                          | Parameter                                      | Mean ± SD                          | Patients   | % of Cohort    |
| 1<br>2                                                                                                                                                                                                                                                                                                          | Age at Diagnosis                               | 59.0 +/- 19.0<br>60.8 +/- 17.5     |            |                |
| 1<br>2                                                                                                                                                                                                                                                                                                          | Female                                         |                                    | 313<br>295 | 49.5%<br>46.7% |
| 1<br>2                                                                                                                                                                                                                                                                                                          | Male                                           |                                    | 273<br>287 | 43.2%<br>45.4% |
| 1<br>2                                                                                                                                                                                                                                                                                                          | Black or African American                      |                                    | 43<br>39   | 6.8%<br>6.2%   |
| 1<br>2                                                                                                                                                                                                                                                                                                          | White                                          |                                    | 408<br>423 | 64.6%<br>66.9% |
| 1<br>2                                                                                                                                                                                                                                                                                                          | Asian                                          |                                    | 15<br>10   | 2.4%<br>1.6%   |
| 1<br>2                                                                                                                                                                                                                                                                                                          | Other Race                                     |                                    | 14<br>11   | 2.2%<br>1.7%   |
| 1<br>2                                                                                                                                                                                                                                                                                                          | Hemoglobin (in g/dl) in Blood                  | 13.0 +/- 2.2<br>12.5 +/- 2.5       |            |                |
| 1<br>2                                                                                                                                                                                                                                                                                                          | Platelets (in ×10 <sup>3</sup> /μl) in Blood   | 274.0 +/- 154.8<br>225.5 +/- 121.4 |            |                |
| 1<br>2                                                                                                                                                                                                                                                                                                          | Monocytes (in ×10 <sup>3</sup> /μl) in Blood   | 84.7 +/- 202.8<br>1.7 +/- 16.8     |            |                |
| 1<br>2                                                                                                                                                                                                                                                                                                          | Basophils (in ×10 <sup>3</sup> /μl) in Blood   | 4.2 +/- 11.1<br>0.3 +/- 3.0        |            |                |
| 1<br>2                                                                                                                                                                                                                                                                                                          | Eosinophils (in ×10 <sup>3</sup> /μl) in Blood | 5.8 +/- 18.2<br>0.1 +/- 0.1        |            |                |
| 1<br>2                                                                                                                                                                                                                                                                                                          | Leukocytes (in ×10 <sup>3</sup> /μl) in Blood  | 10.8 +/- 13.8<br>8.9 +/- 9.1       |            |                |

## Supplementary Table S1: Patient characteristics

### H) Simplified IPSS Score

| Cohort 1 (N = 10,243, simplified IPSS 0 points), cohort 2 (N = 7840, simplified IPSS 1 point), cohort 3 (N = 1049, simplified IPSS 2 points) and cohort 4 (N= 29, simplified IPSS 3 points) characteristics without propensity score matching. Cohort sizes may differ from the numbers indicated in Figure 2 due to the exclusion of patients with outcome prior to the index event. |                                                      |               |          |             |
|---------------------------------------------------------------------------------------------------------------------------------------------------------------------------------------------------------------------------------------------------------------------------------------------------------------------------------------------------------------------------------------|------------------------------------------------------|---------------|----------|-------------|
| Cohort                                                                                                                                                                                                                                                                                                                                                                                | Parameter                                            | Mean $\pm$ SD | Patients | % of Cohort |
| 1                                                                                                                                                                                                                                                                                                                                                                                     | Age at Diagnosis                                     | 48.7 +/- 13.4 |          |             |
| 2                                                                                                                                                                                                                                                                                                                                                                                     |                                                      | 66.6 +/- 12.7 |          |             |
| 3                                                                                                                                                                                                                                                                                                                                                                                     |                                                      | 71.6 +/- 6.8  |          |             |
| 4                                                                                                                                                                                                                                                                                                                                                                                     |                                                      | 74.5 +/- 4.2  |          |             |
| 1                                                                                                                                                                                                                                                                                                                                                                                     | Female                                               |               | 5549     |             |
| 2                                                                                                                                                                                                                                                                                                                                                                                     |                                                      |               | 3788     |             |
| 3                                                                                                                                                                                                                                                                                                                                                                                     |                                                      |               | 476      |             |
| 4                                                                                                                                                                                                                                                                                                                                                                                     |                                                      |               | 10       |             |
| 1                                                                                                                                                                                                                                                                                                                                                                                     | Male                                                 |               | 3907     |             |
| 2                                                                                                                                                                                                                                                                                                                                                                                     |                                                      |               | 3450     |             |
| 3                                                                                                                                                                                                                                                                                                                                                                                     |                                                      |               | 522      |             |
| 4                                                                                                                                                                                                                                                                                                                                                                                     |                                                      |               | 18       |             |
| 1                                                                                                                                                                                                                                                                                                                                                                                     | Black or African American                            |               | 871      |             |
| 2                                                                                                                                                                                                                                                                                                                                                                                     |                                                      |               | 597      |             |
| 3                                                                                                                                                                                                                                                                                                                                                                                     |                                                      |               | 86       |             |
| 4                                                                                                                                                                                                                                                                                                                                                                                     |                                                      |               | 0        |             |
| 1                                                                                                                                                                                                                                                                                                                                                                                     | White                                                |               | 5504     |             |
| 2                                                                                                                                                                                                                                                                                                                                                                                     |                                                      |               | 6904     |             |
| 3                                                                                                                                                                                                                                                                                                                                                                                     |                                                      |               | 677      |             |
| 4                                                                                                                                                                                                                                                                                                                                                                                     |                                                      |               | 21       |             |
| 1                                                                                                                                                                                                                                                                                                                                                                                     | Asian                                                |               | 218      |             |
| 2                                                                                                                                                                                                                                                                                                                                                                                     |                                                      |               | 118      |             |
| 3                                                                                                                                                                                                                                                                                                                                                                                     |                                                      |               | 19       |             |
| 4                                                                                                                                                                                                                                                                                                                                                                                     |                                                      |               | 10       |             |
| 1                                                                                                                                                                                                                                                                                                                                                                                     | Other Race                                           |               | 254      |             |
| 2                                                                                                                                                                                                                                                                                                                                                                                     |                                                      |               | 127      |             |
| 3                                                                                                                                                                                                                                                                                                                                                                                     |                                                      |               | 20       |             |
| 4                                                                                                                                                                                                                                                                                                                                                                                     |                                                      |               | 10       |             |
| 1                                                                                                                                                                                                                                                                                                                                                                                     | Hemoglobin (in g/dl) in Blood                        | 13.4 +/- 1.9  |          |             |
| 2                                                                                                                                                                                                                                                                                                                                                                                     |                                                      | 12.6 +/- 2.3  |          |             |
| 3                                                                                                                                                                                                                                                                                                                                                                                     |                                                      | 10.1 +/- 1.9  |          |             |
| 4                                                                                                                                                                                                                                                                                                                                                                                     |                                                      | 8.7 +/- 1.3   |          |             |
| 1                                                                                                                                                                                                                                                                                                                                                                                     | Platelets (in $\times 10^3/\mu\text{l}$ ) in Blood   | 238 +/- 103   |          |             |
| 2                                                                                                                                                                                                                                                                                                                                                                                     |                                                      | 220 +/- 111   |          |             |
| 3                                                                                                                                                                                                                                                                                                                                                                                     |                                                      | 207 +/- 148   |          |             |
| 4                                                                                                                                                                                                                                                                                                                                                                                     |                                                      | 229 +/- 149   |          |             |
| 1                                                                                                                                                                                                                                                                                                                                                                                     | Monocytes (in $\times 10^3/\mu\text{l}$ ) in Blood   | 8.1 +/- 3.5   |          |             |
| 2                                                                                                                                                                                                                                                                                                                                                                                     |                                                      | 8.7 +/- 4.1   |          |             |
| 3                                                                                                                                                                                                                                                                                                                                                                                     |                                                      | 8.2 +/- 5.7   |          |             |
| 4                                                                                                                                                                                                                                                                                                                                                                                     |                                                      | 4.6 +/- 4.7   |          |             |
| 1                                                                                                                                                                                                                                                                                                                                                                                     | Basophils (in $\times 10^3/\mu\text{l}$ ) in Blood   | 0.6 +/- 0.6   |          |             |
| 2                                                                                                                                                                                                                                                                                                                                                                                     |                                                      | 0.6 +/- 0.8   |          |             |
| 3                                                                                                                                                                                                                                                                                                                                                                                     |                                                      | 0.7 +/- 2.3   |          |             |
| 4                                                                                                                                                                                                                                                                                                                                                                                     |                                                      | 1.7 +/- 2.3   |          |             |
| 1                                                                                                                                                                                                                                                                                                                                                                                     | Eosinophils (in $\times 10^3/\mu\text{l}$ ) in Blood | 2.4 +/- 2.6   |          |             |
| 2                                                                                                                                                                                                                                                                                                                                                                                     |                                                      | 2.6 +/- 2.6   |          |             |
| 3                                                                                                                                                                                                                                                                                                                                                                                     |                                                      | 2.2 +/- 2.4   |          |             |
| 4                                                                                                                                                                                                                                                                                                                                                                                     |                                                      | 1.9 +/- 3.0   |          |             |
| 1                                                                                                                                                                                                                                                                                                                                                                                     | Leukocytes (in $\times 10^3/\mu\text{l}$ ) in Blood  | 8.0 +/- 6.6   |          |             |
| 2                                                                                                                                                                                                                                                                                                                                                                                     |                                                      | 15.0 +/- 187  |          |             |
| 3                                                                                                                                                                                                                                                                                                                                                                                     |                                                      | 20.9 +/- 186  |          |             |
| 4                                                                                                                                                                                                                                                                                                                                                                                     |                                                      | 158 +/- 479   |          |             |
